# Supplementary material
Source: PubMed Central journal article supplement (PMC8663475)
Supplement: NIHMS1756198-supplement-1.pdf [file NIHMS1756198-supplement-1.pdf]

1 **Supplementary Information**

2 **3D bioprinting of a trachea-mimetic cellular construct of a clinically relevant size**

3 Jeong Hun Park<sup>1</sup>, Minjun Ahn<sup>1</sup>, Sun Hwa Park<sup>1</sup>, Hyeonji Kim, Mihyeon Bae, Wonbin Park,  
4 Scott J. Hollister<sup>\*</sup>, Sung Won Kim<sup>\*</sup>, and Dong-Woo Cho<sup>\*</sup>

5

6 <sup>1</sup> These authors contributed equally to this work.

7 <sup>\*</sup> Corresponding authors:

8 Prof. Dong-Woo Cho, Ph.D. (E-mail: [dwcho@postech.ac.kr](mailto:dwcho@postech.ac.kr))

9 Prof. Sung Won Kim, Ph.D. (E-mail: [kswent@catholic.ac.kr](mailto:kswent@catholic.ac.kr))

10 Prof. Scott, J. Hollister, Ph.D. (E-mail: [scott.hollister@bme.gatech.edu](mailto:scott.hollister@bme.gatech.edu))

11

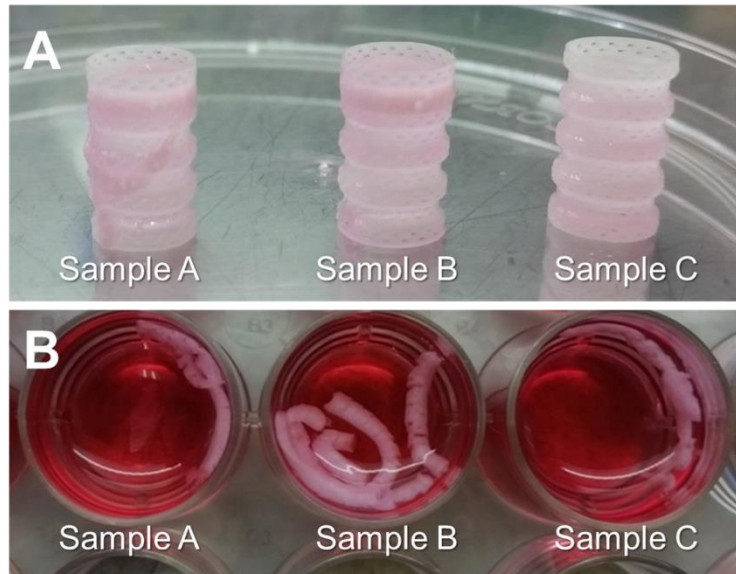

1  
2 **Fig. S1.** Poor hydrophilicity of tracheal construct printed with PCL. (A) Photograph of tracheal  
3 constructs with dislocated or detached cartilage rings after 3 days of culture *in vitro*. (B)  
4 Photograph of detached cartilage rings from tracheal constructs in the culture medium.  
5

1 **Table S1.** Sequences of primers applied in qRT-PCR analysis.

| <b>Gene</b>                       | <b>Sequence</b> |                        |
|-----------------------------------|-----------------|------------------------|
| <b>GAPDH</b>                      | Forward         | GTCTCCTCTGACTTCAACAGCG |
|                                   | Reverse         | ACCACCCTGTTGCTGTAGCCAA |
| <b>SOX9</b>                       | Forward         | AGGAAGCTCGCGGACCAGTAC  |
|                                   | Reverse         | GGTGGTCCTTCTTGTGCTGCAC |
| <b>ACAN</b>                       | Forward         | AGTATCATCAGTCCCAGAAT   |
|                                   | Reverse         | AATGCAGAGGTGGTTTCACT   |
| <b>COL2</b>                       | Forward         | CCTGGCAAAGATGGTGAGACAG |
|                                   | Reverse         | CCTGGTTTTCCACCTTCACCTG |
| <b>Mucin</b>                      | Forward         | CCACTGGTTCTATGGCAACACC |
|                                   | Reverse         | GCCGAAGTCCAGGCTGTGCG   |
| <b>Keratin-14</b>                 | Forward         | TGCCGAGGAATGGTTCTTCACC |
|                                   | Reverse         | GCAGCTCAATCTCCAGGTTCTG |
| <b><math>\beta</math>-tubulin</b> | Forward         | TTGGGAGGTCATCAGCGATGAG |
|                                   | Reverse         | AGGCTCCAGATCCACCAGGATG |

2
